# Supplementary material for: IgG Fc-Binding Peptide-Conjugated Pan-CoV Fusion Inhibitor Exhibits Extended In Vivo Half-Life and Synergistic Antiviral Effect When Combined with Neutralizing Antibodies
Source: MDPI journal article supplement (doi:10.3390/biom13091283), 2023-08-22
Supplement: s1 [file s1]

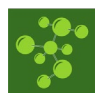

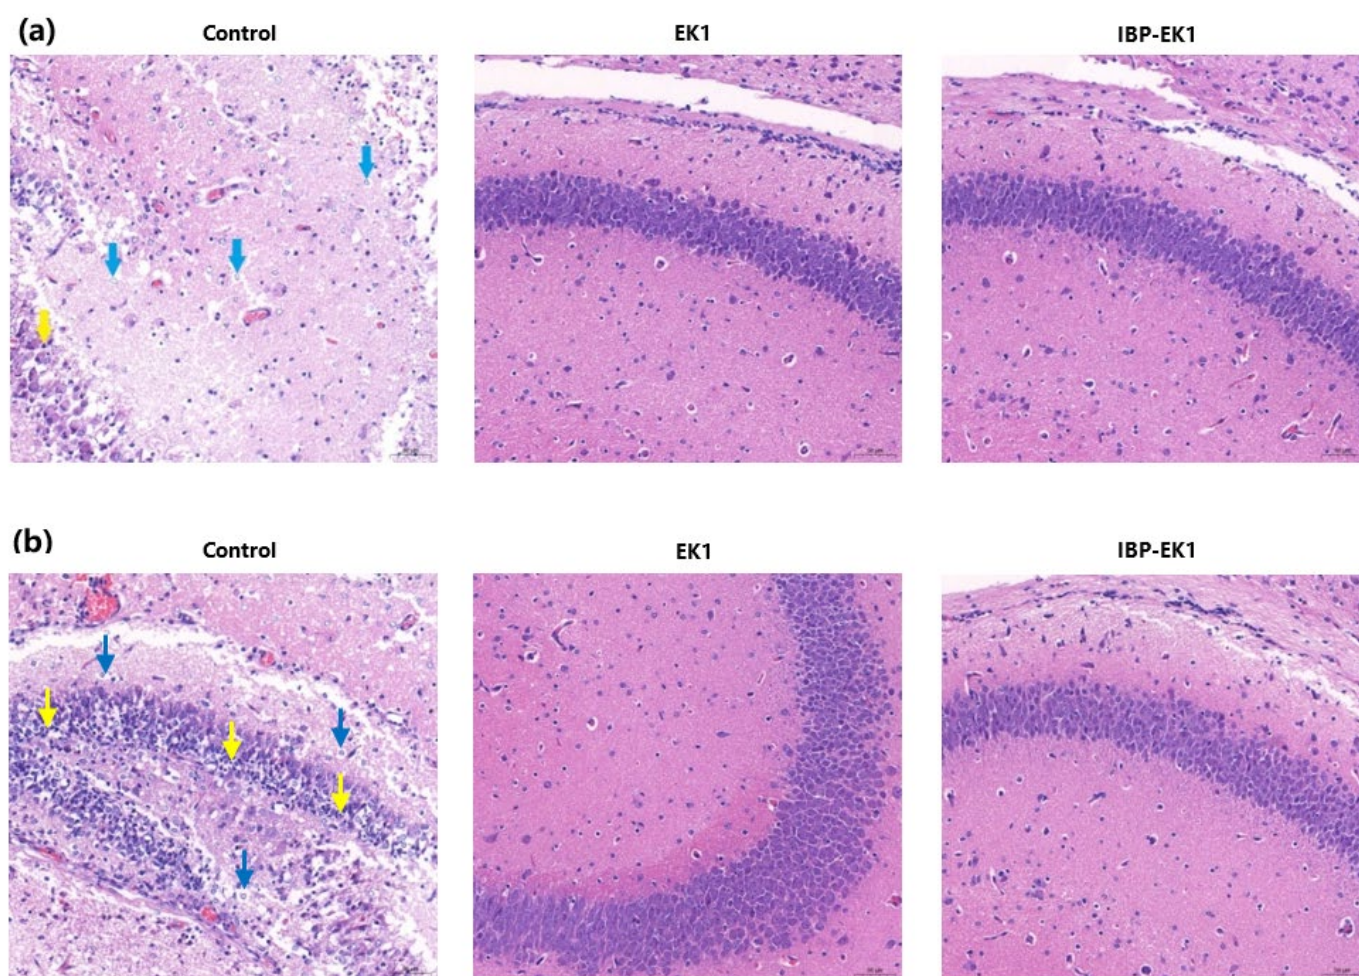

**Figure S2.** Pathology sections of mouse brain tissues of each group 5 days after administration. (a) Pathology sections of mouse brain tissues of each group 5 days after prophylactic administration. (b) Pathology sections of mouse brain tissues of each group 5 days after therapeutic administration. Scale bar, 50  $\mu$ m.

(a)

| Identities    |                                                      | Positives                  | Gaps       |
|---------------|------------------------------------------------------|----------------------------|------------|
| 200/223 (90%) |                                                      | 210/223 (94%)              | 0/223 (0%) |
| 5W5L 225      | TCPPCPAPELLGGPSVFLFPPKPKD                            | LMISRTPEVTCVVVDVSQEDPDVKFN |            |
| 6D4E 225      | .....AA.AS.....A...E....                             |                            |            |
| 5W5L          | WYVNGAEVHHAQTKPRETQYNSTYRVVSVLTVTHQDWLNGKEYTCKVSNKAL |                            |            |
| 6D4E          | ...D.V...N.K.....E.....L.....K.....                  |                            |            |
| 5W5L          | PAPIQKTISKDKGQPREPQVYTLPPSREELTKNQVSLTCLVKGFYPSDIIVE |                            |            |
| 6D4E          | .SS.E.....A.....D.....A..                            |                            |            |
| 5W5L          | WESSGQPENTYKTTTPVLDSGYSFLYSKLTVDKSRWQQGNVFCFSVMHEAL  |                            |            |
| 6D4E          | ...N.....N.....F.....                                |                            |            |
| 5W5L          | HNHYTQKSLSVSPGK 447                                  |                            |            |
| 6D4E          | .....L..... 447                                      |                            |            |

(b)

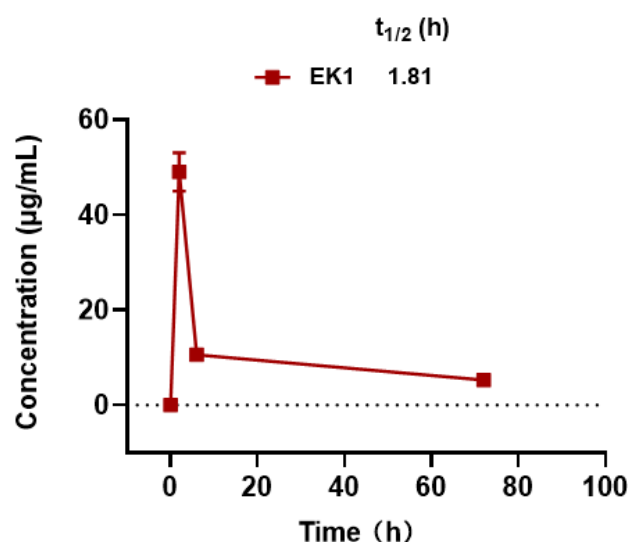

**Figure S3.** Homology between IgG1 Fc region of homo sapiens and rhesus monkey, and measured EK1 concentrations in sera by HPLC-MS/MS. **(a)** Homology between IgG1 Fc region of homo sapiens and rhesus monkey. Fasta files of IgG1 Fc CH2-CH3 region of human (PDB ID: 5W5L) and rhesus monkey (PDB ID: 6D4E) were exported from PDB, respectively, and aligned by blastp tool. Residues in red boxes are critical residues binding to IBP. **(b)** Measured EK1 concentrations in rhesus monkey sera by the method of HPLC-MS/MS. Sera were diluted 10-fold and then injected into UPLC-Q-TOF-MS for detection.

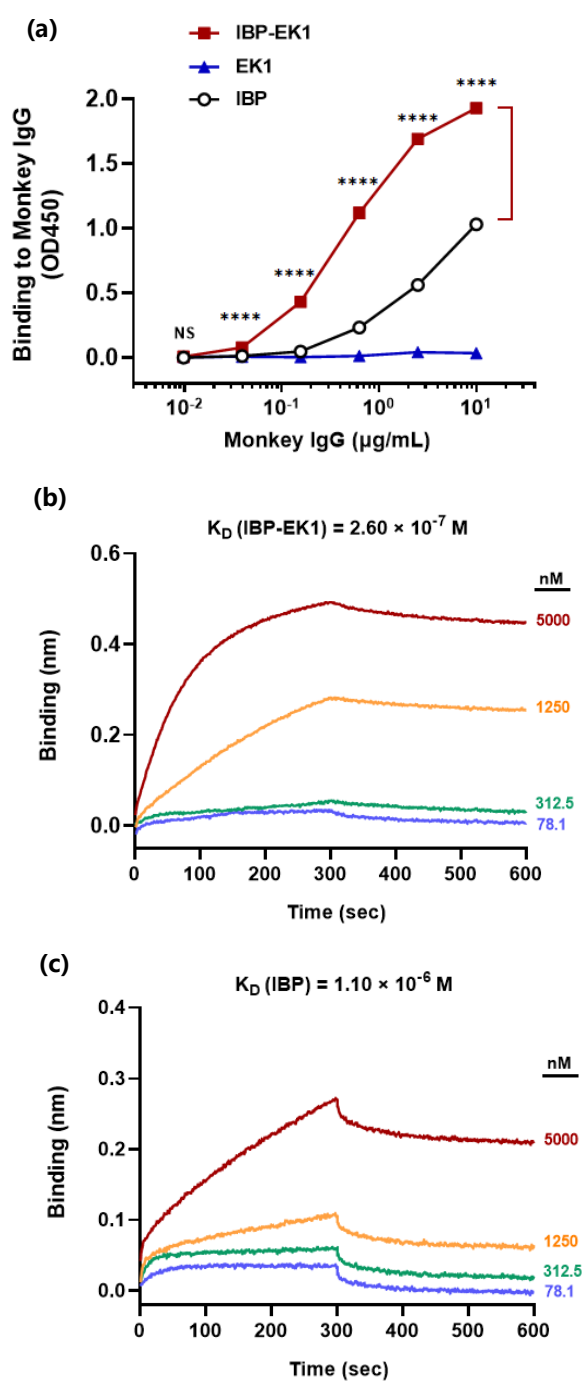

**Figure S4.** Binding of IBP, EK1 and IBP-EK1 to rhesus monkey IgG, as detected by ELISA (a) and BLI (b-d). NS,  $p > 0.05$ ; \*\*\*\*  $p < 0.0001$ . In the BLI assay, 10  $\mu\text{g/mL}$  IgG were immobilized at the surface of Fc biosensors, and then diluted peptide solutions were loaded. Data were analyzed and globally fit with the ForteBio software. Equilibrium dissociation constants ( $K_D$ ) are reported above the plot.

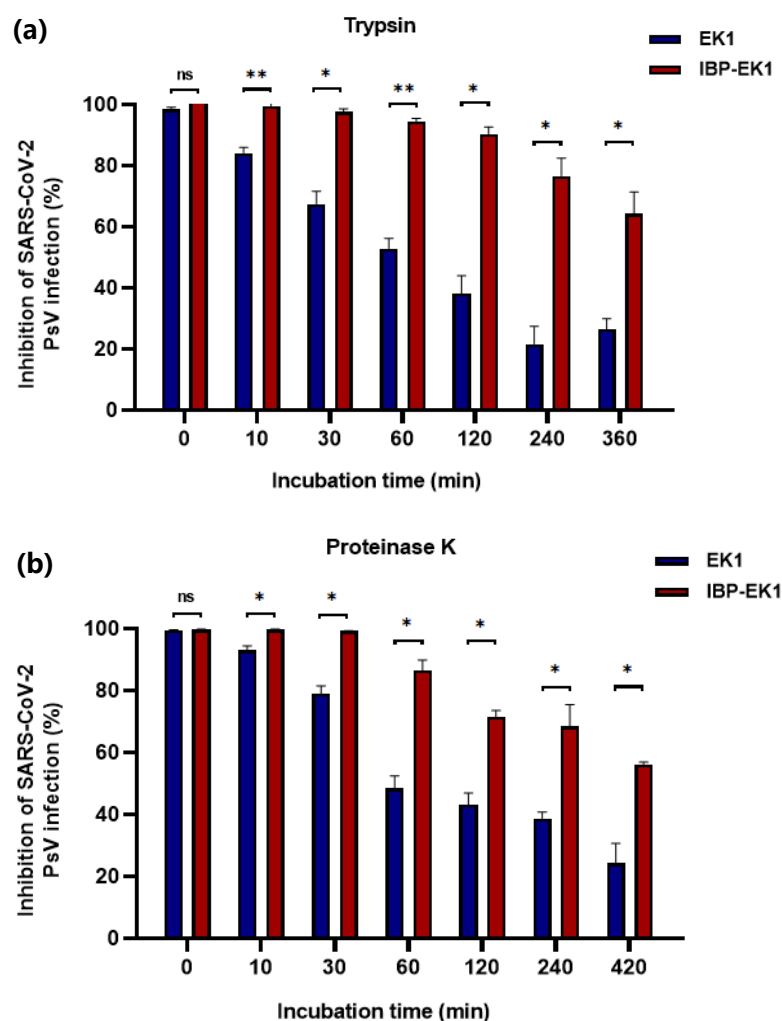

**Figure S5.** Tolerance of IBP-EK1 to protease digestion. (a) Inhibitory activities against SARS-CoV-2 PsV infection of EK1 and IBP-EK1 samples incubated with 25  $\mu\text{g/mL}$  trypsin for different time. (b) Inhibitory activities against SARS-CoV-2 PsV infection of EK1 and IBP-EK1 samples incubated with 100  $\mu\text{g/mL}$  proteinase K for different time. Unpaired, 2-tailed  $-t$  test was performed. No significance (ns),  $p > 0.05$ ; \*  $p < 0.05$ , \*\*  $p < 0.01$ . A representative example of two independent experiments was shown.

**Table S1.**  $\text{IC}_{50}$  values of S309 and 10933 against PsV infection of sarbecoviruses (mainly SARS-CoV-2 variants). ND, not detected. Each experiment was repeated twice.

| Sarbecoviruses       | $\text{IC}_{50}$ (ng/mL) against pseudotyped sarbecoviruses<br>on Caco-2 cells |       |
|----------------------|--------------------------------------------------------------------------------|-------|
|                      | S309                                                                           | 10933 |
|                      |                                                                                |       |
| SARS-CoV             | 86                                                                             | ND    |
| WIV1-CoV             | 769                                                                            | ND    |
| SARS-CoV-2 prototype | 722                                                                            | 27    |
| B.1.1.7              | 134                                                                            | 12    |
| B.1.351              | 90                                                                             | 114   |
| P.1                  | 150                                                                            | 137   |

|           |      |          |
|-----------|------|----------|
| B.1.617.2 | 284  | 20       |
| BA.1      | 323  | 1859     |
| BA.2      | 482  | >10,000  |
| BA.2.12.1 | 574  | >10,000  |
| BA.2.75   | 640  | >10,000  |
| BA.5      | 706  | >100,000 |
| BA.4.6    | 1340 | >100,000 |
| BF.7      | 1098 | >100,000 |
| XBB       | 1278 | >100,000 |
| BQ.1.1    | 4180 | >100,000 |

**Table S2.** Combination index and dose reduction values of inhibiting SARS-CoV-2 S-mediated cell-cell fusion by IBP-EK1 combination with S309.

| % Inhibition<br>for IBP-EK1 in<br>combination<br>with S309<br>against cell-<br>cell fusion | CI   | S309          |      |                   | IBP-EK1       |       |                   |
|--------------------------------------------------------------------------------------------|------|---------------|------|-------------------|---------------|-------|-------------------|
|                                                                                            |      | Concentration |      | Dose<br>reduction | Concentration |       | Dose<br>reduction |
|                                                                                            |      | (nM)          |      |                   | (nM)          |       |                   |
|                                                                                            |      | Alone         | Mix  |                   | Alone         | Mix   |                   |
| 10                                                                                         | 0.44 | 0.13          | 0.03 | 3.9               | 25.7          | 4.8   | 5.4               |
| 20                                                                                         | 0.34 | 0.42          | 0.07 | 5.8               | 65.6          | 11.0  | 6.0               |
| 30                                                                                         | 0.29 | 0.96          | 0.13 | 7.5               | 122.2         | 19.1  | 6.4               |
| 40                                                                                         | 0.26 | 1.86          | 0.20 | 9.3               | 203.6         | 30.0  | 6.8               |
| 50                                                                                         | 0.23 | 3.42          | 0.30 | 11.3              | 325.0         | 45.5  | 7.1               |
| 60                                                                                         | 0.21 | 6.30          | 0.46 | 13.7              | 519.0         | 68.9  | 7.5               |
| 70                                                                                         | 0.18 | 12.25         | 0.72 | 17.0              | 864.3         | 108.4 | 8.0               |
| 80                                                                                         | 0.16 | 27.59         | 1.25 | 22.0              | 1610          | 188.2 | 8.6               |
| 90                                                                                         | 0.14 | 93.55         | 2.88 | 32.5              | 4105          | 432.1 | 9.5               |

**Table S3.** Prediction of the physicochemical properties of IBP-EK1 and IBP. GRAVY, Grand average of hydropathicity; if the value is negative, the protein/peptide is hydrophilic, otherwise hydrophobic. The ProtParam tool (<https://web.expasy.org/protparam/>) was adopted to predict these properties.

| Properties        | IBP-EK1        | IBP              | EK1            |
|-------------------|----------------|------------------|----------------|
| Instability index | 29.30 (stable) | 46.72 (unstable) | 22.73 (stable) |
| GRAVY             | -0.206         | 0.423            | -0.433         |
| Aliphatic index   | 111.43         | 90.00            | 119.17         |

**Table S4.** Rate constants and  $K_D$  values of IBP-EK1 and IBP to human or rhesus monkey IgG.

| Constants               | human IgG             |                       | rhesus monkey IgG     |                       |
|-------------------------|-----------------------|-----------------------|-----------------------|-----------------------|
|                         | IBP-EK1               | IBP                   | IBP-EK1               | IBP                   |
| $K_{on}$ ( $M s^{-1}$ ) | $3.30 \times 10^3$    | $2.80 \times 10^3$    | $2.04 \times 10^3$    | $1.27 \times 10^3$    |
| $K_{off}$ ( $s^{-1}$ )  | $7.17 \times 10^{-4}$ | $2.87 \times 10^{-3}$ | $5.29 \times 10^{-4}$ | $1.40 \times 10^{-3}$ |
| $K_D$ (M)               | $2.17 \times 10^{-7}$ | $1.03 \times 10^{-6}$ | $2.60 \times 10^{-7}$ | $1.10 \times 10^{-6}$ |
